# Supplementary material
Source: PubMed Central journal article supplement (PMC4776026)
Supplement: mmc1.pdf [file mmc1.pdf]

**Biophysical Journal, Volume 110**

**Supplemental Information**

**Binding of NF $\kappa$ B Appears to Twist the Ankyrin Repeat Domain of I $\kappa$ B $\alpha$**

**Morten Beck Trelle, Kristen M. Ramsey, Taehyung C. Lee, Weihua Zheng, Jorge Lamboy, Peter G. Wolynes, Ashok Deniz, and Elizabeth A. Komives**

Supplementary Data for

## Binding of NF $\kappa$ B appears to twist the ankyrin repeat domain of I $\kappa$ B $\alpha$

M. B. Trelle, K. M. Ramsey, T. C. Lee, W. Zheng, J. Lamboy, P. G. Wolynes, A. Deniz and E. A. Komives

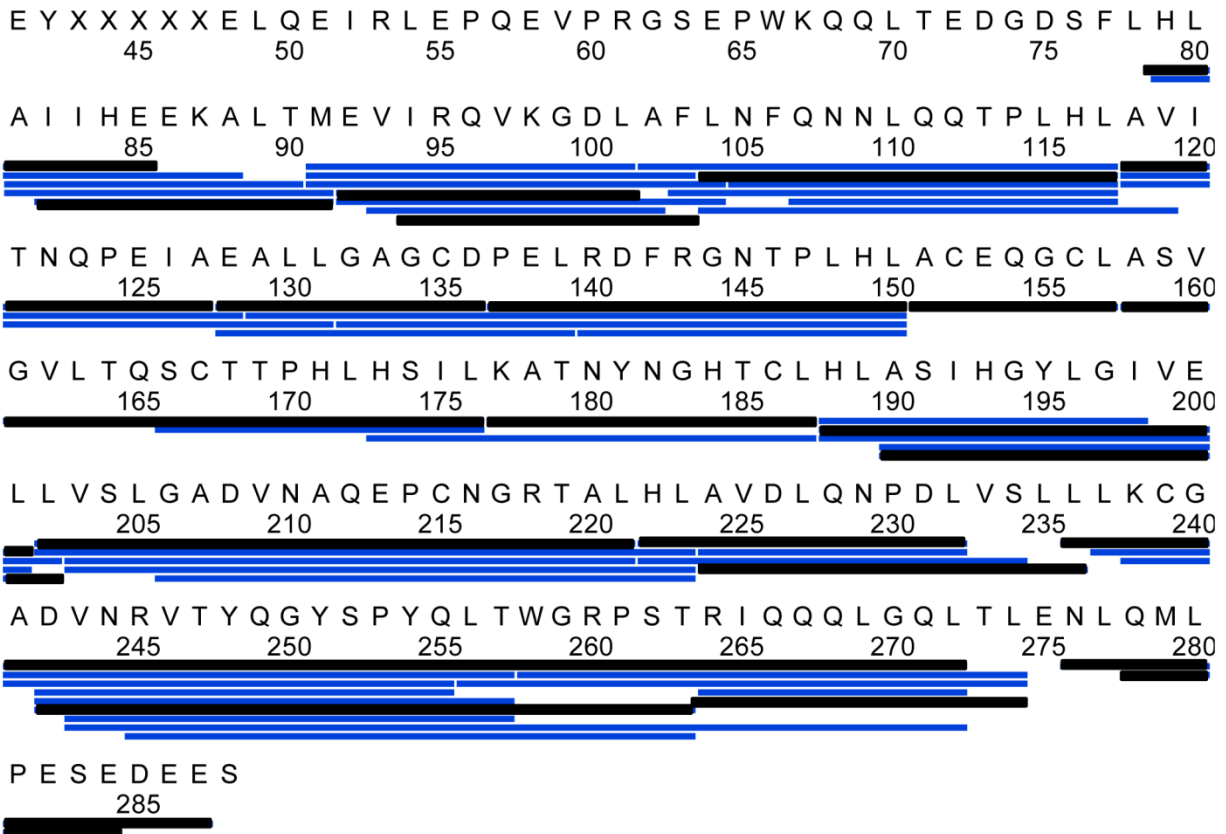

Supplementary Figure 1. HXMS Coverage map showing all the peptides with quantifiable data as bars under the sequence. The black bars are those peptides for which data are shown in Supplementary Figure 2.

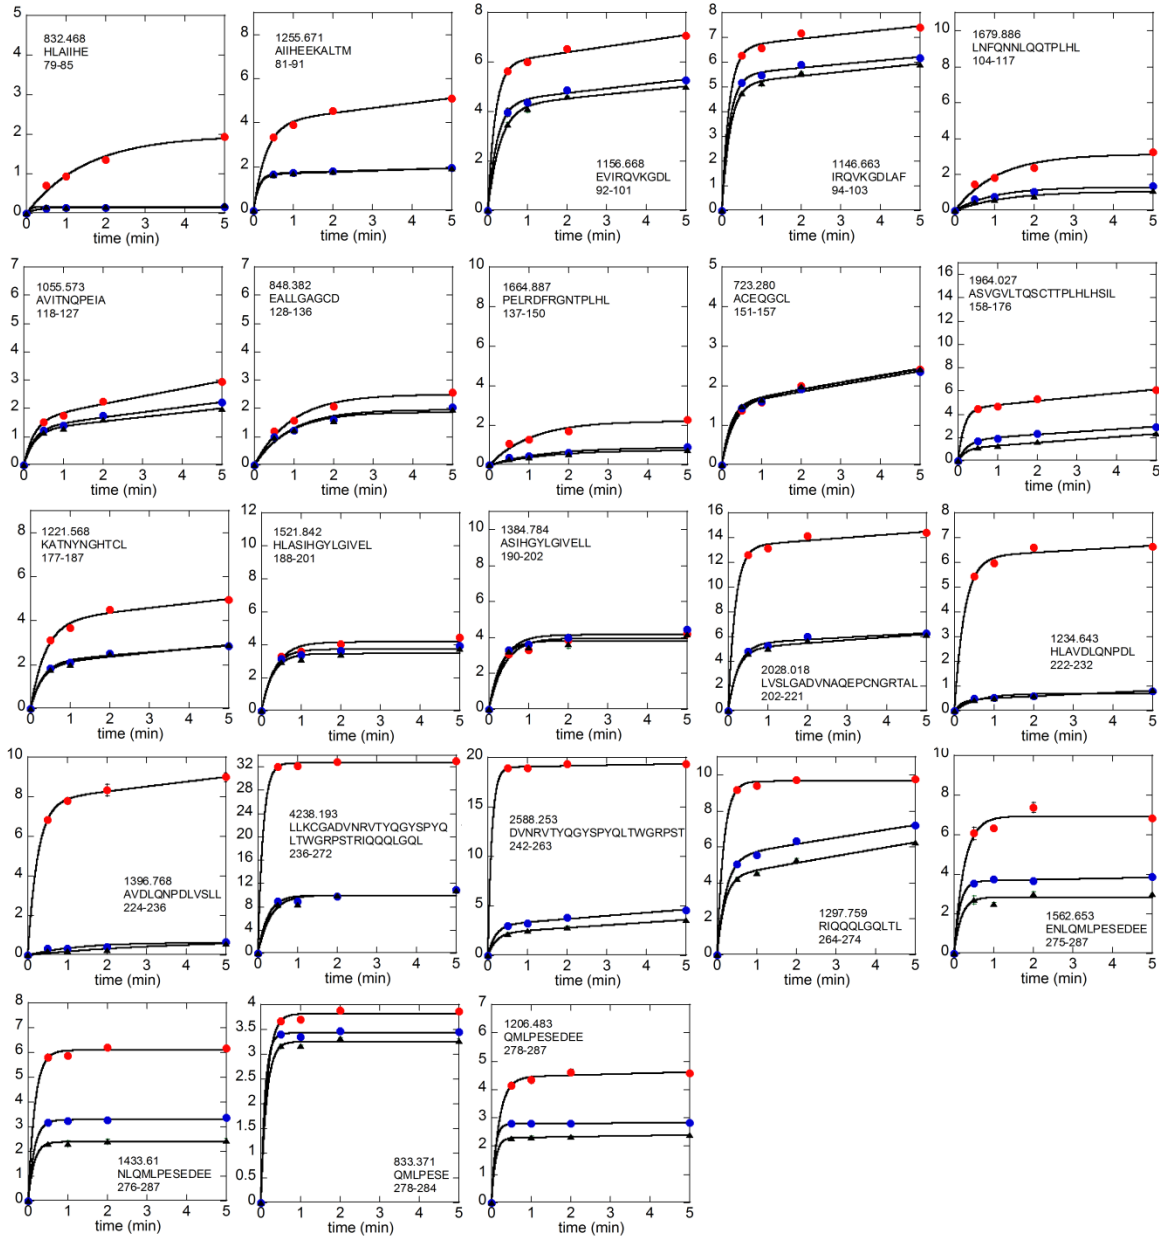

Supplementary Figure 2. Deuterium uptake plots for free  $\text{I}\kappa\text{B}\alpha$  (red circles),  $\text{I}\kappa\text{B}\alpha$  bound to the dimerization domain only construct of  $\text{NF}\kappa\text{B}$  (blue circles), and  $\text{I}\kappa\text{B}\alpha$  bound to full-length  $\text{NF}\kappa\text{B}$  (black triangles). The sequence, peptide mass ( $\text{MH}^+$ ), and residue numbers are given on each graph.
